# Supplementary material for: Environment-friendly preparation of porous graphite-phase polymeric carbon nitride using calcium carbonate as templates, and enhanced photoelectrochemical activity
Source: Royal Society of Chemistry journal article supplement (doi:10.1039/c4ta06778a), 2015-01-01
Supplement: c4ta06778a1.pdf [file c4ta06778a1.pdf]

## Supporting Information

### Environment-Friendly Preparation of Porous Graphite-Phase Polymeric Carbon Nitride Using Calcium Carbonate as Templates and Enhanced Photoelectrochemical Activity

Jianhai Wang, Cheng Zhang, Yanfei Shen, Zhixin Zhou, Jiachao Yu, Ying Li, Wei Wei, Songqin Liu, Yuanjian Zhang\*

Jiangsu Province Hi-Tech Key Laboratory for Bio-Medical Research, School of Chemistry and Chemical Engineering, Medical School, Southeast University, Nanjing 211189, China, E-mail: Yuanjian.Zhang@seu.edu.cn

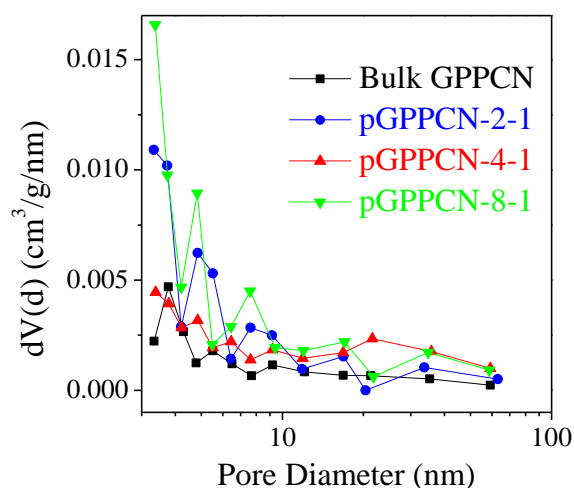

**Fig. S1** The pore-size distribution curves of GPPCN and various porous GPPCN (d=340 nm) calculated from the desorption branches of nitrogen adsorption-desorption isotherms (Fig. 3f) using Barret–Joyner–Halender (BJH) method.
